# Supplementary material for: The Suinfort® Semen Supplement Counters Seasonal Infertility in Iberian Sows
Source: MDPI journal article supplement (doi:10.3390/ani11113176), 2021-11-06
Supplement: s1 [file s1]

# The Suinfort® Semen Supplement Counters Seasonal Infertility in Iberian Sows

Javier Piñán <sup>1</sup>, Felipe Martinez-Pastor <sup>1,2</sup>, Beatriz Alegre <sup>1,3</sup>, Magdalena Maj <sup>4</sup>, Roy N Kirkwood <sup>5</sup>, Juan Carlos Domínguez <sup>1,3</sup>, Rodrigo Manjarín <sup>6,\*</sup>

<sup>1</sup> Institute of Animal Health and Cattle Development (INDEGSAL), Universidad de León, 24071 León, Spain

<sup>2</sup> Department of Molecular Biology (Cell Biology), Universidad de León, 24071 León, Spain

<sup>3</sup> Department of Animal Medicine, Surgery and Anatomy (Animal Medicine and Surgery), Universidad de León, 24071 León, Spain

<sup>4</sup> Department of Biological Sciences, California Polytechnic State University, One Grand Ave, Bldg. 10, San Luis Obispo, CA 93407-0255

<sup>5</sup> School of Animal and Veterinary Sciences, University of Adelaide, Roseworthy, SA 5371, Australia

<sup>6</sup> Animal Science Department, California Polytechnic State University, One Grand Ave, Bldg. 10, San Luis Obispo, CA 93407-0255

\* Correspondence: felipe.martinez@unileon.es; Tel.: +34 687365362

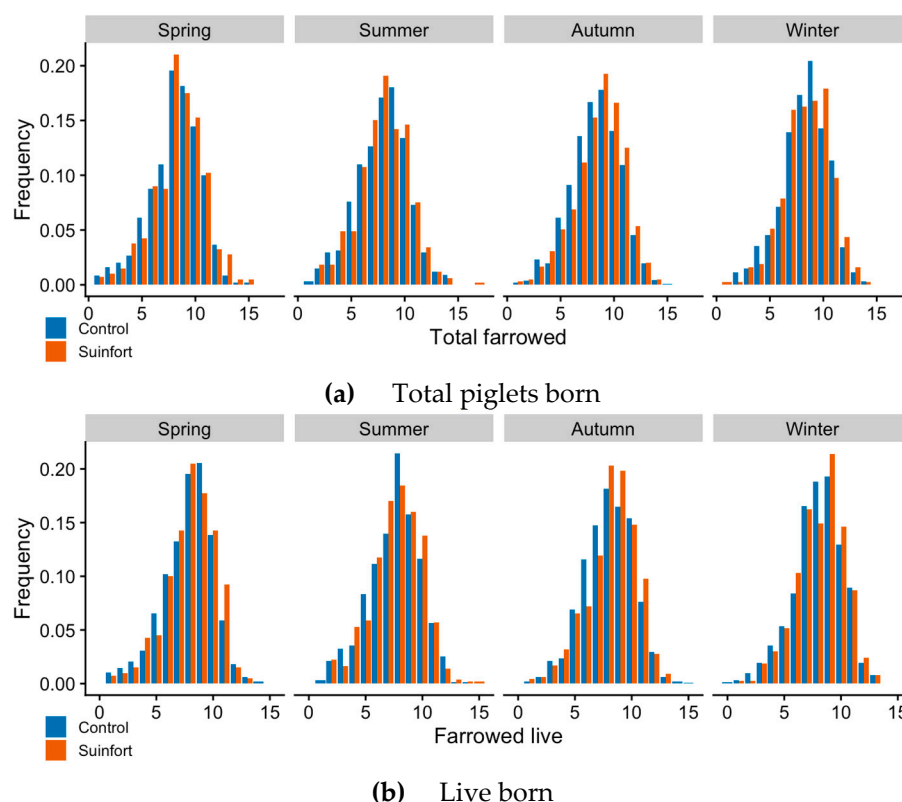

**Figure S1.** Frequency distribution of total (a) and live (b) piglets per farrowing in each season for the Control and Suinfort® treatments. AI resulting in no pregnancy were excluded.

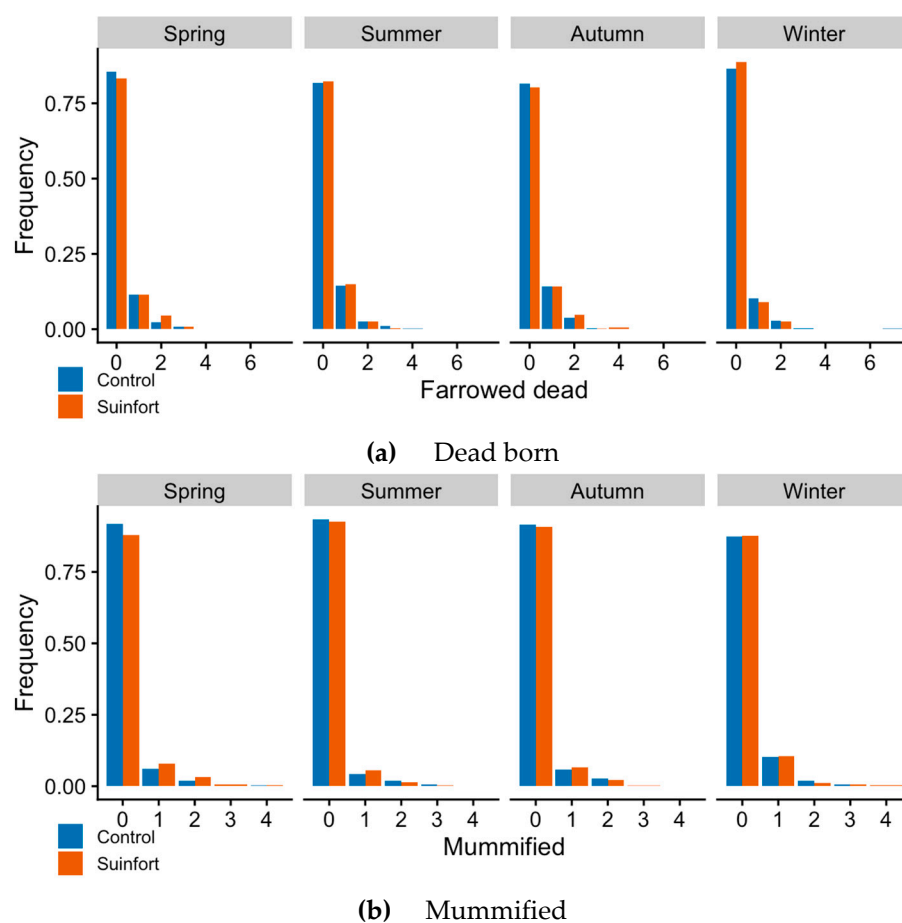

**Figure S2.** Frequency distribution of stillborn (a), and mummified (b) piglets per farrowing in each season for the Control and Suinfort® treatments. AI resulting in no pregnancy were excluded.
